# Supplementary material for: Clinical significance of PD-1/PD-Ls gene amplification and overexpression in patients with hepatocellular carcinoma
Source: PubMed Central journal article supplement — Theranostics. 2018 Nov 10;8(20):5690–702. doi: 10.7150/thno.28742 (PMC6276293; doi:10.7150/thno.28742), 2018-11-10
Supplement: thnov08p5690s1.pdf [file thnov08p5690s1.pdf]

## **Supplementary Figures and Tables**

**Figure S1:** Optimization of multispectral immunofluorescence staining for PD-L1/PD-L2/PD-1.

**Figure S2:** Schematic overview of four-colors multispectral immunofluorescence work flow in HCC.

**Figure S3:** Copy number values and transcriptional levels of PD-L1/PD-L2/PD-1 evaluated in HCC patients from TCGA database.

**Figure S4:** Representative immunofluorescence images displayed two types of PD-Ls/PD-1 expression status in HCC.

**Figure S5:** Prognostic value of combination of PD-L1 expression and 9p24.1 alterations.

**Table S1:** Patients clinical and pathologic characteristics.

**Table S2:** Univariate analysis of factors associated with recurrence and survival in three independent cohorts (n = 578).

**Table S3:** Multivariate analysis of factors associated with OS and TTR for PD-L1 in tumor.

**Table S4:** Multivariate analysis of factors associated with OS and TTR for PD-L2 in tumor.

**Table S5:** Multivariate analysis of factors associated with survival and recurrence for combined PD-L1 and 9p24.1 alterations.

**Table S6:** Correlations of clinic-pathologic characteristics with PD1/PD-Ls and PD-1 in HCC patients from training cohort (n = 240) and validation cohort (n = 258).

## Supplementary Figure Legends

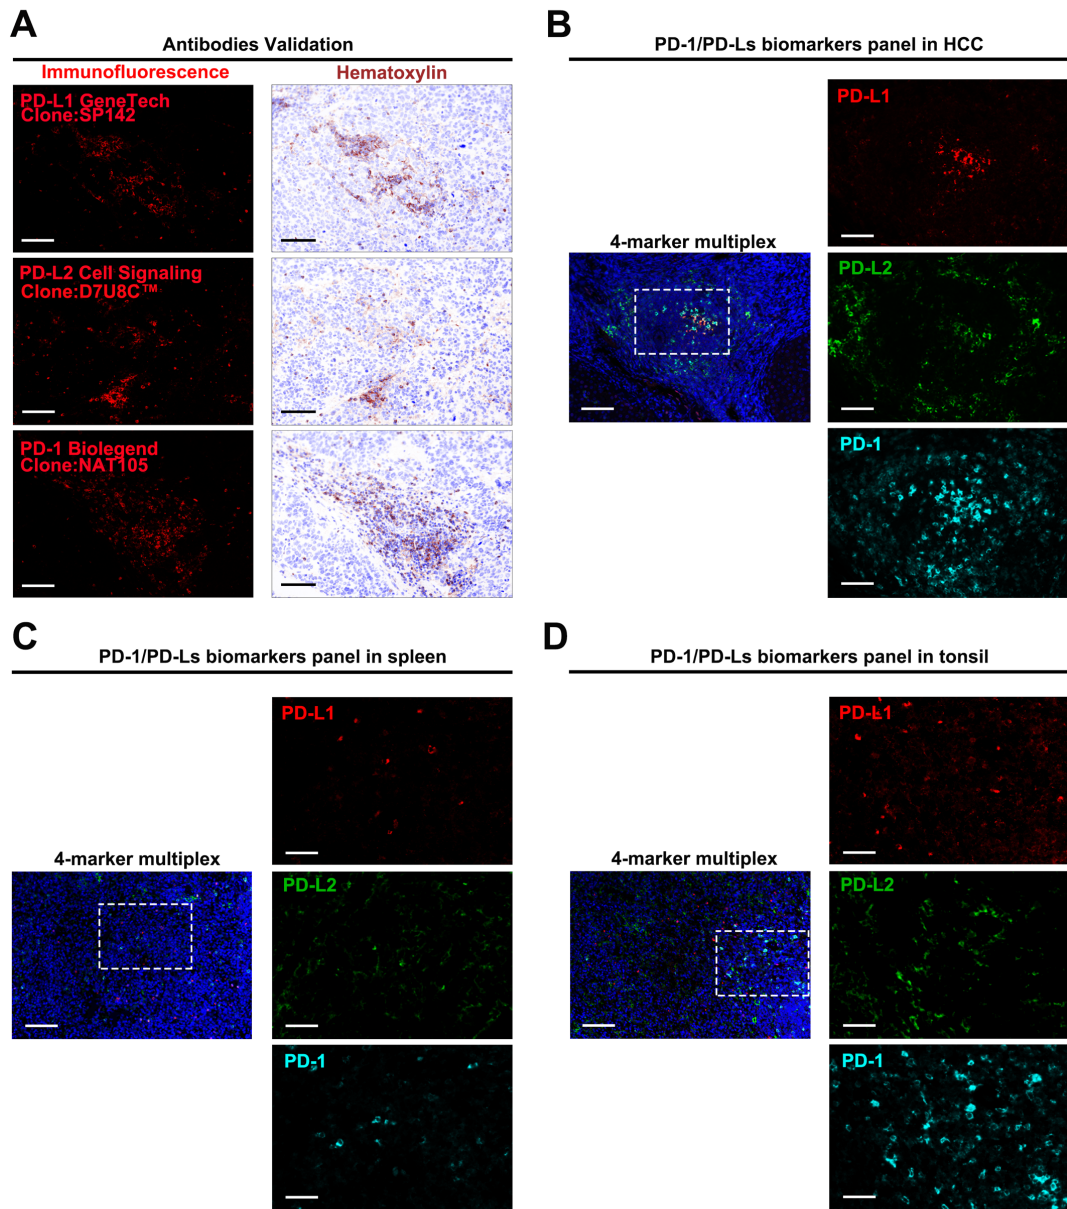

**Figure S1. Optimization of multispectral immunofluorescence staining for PD-L1/PD-L2/PD-1.**

(A) The optimization and validation of PD-L1/PD-L2/PD-1 antibodies used in full HCC FFPE slides. PD-1 (clone NAT105, Biologend), PD-L1 (clone SP142, Genetech) and PD-L2 (clone D7U8C™, Cell Signaling Technology) were chosen to apply in following experiments. (B) Representative fluorescence images displayed each of the three biomarker respectively in HCC tumor tissue. (C) Spleen and (D) tonsil were used as positive controls. Scale bar=100 μm.

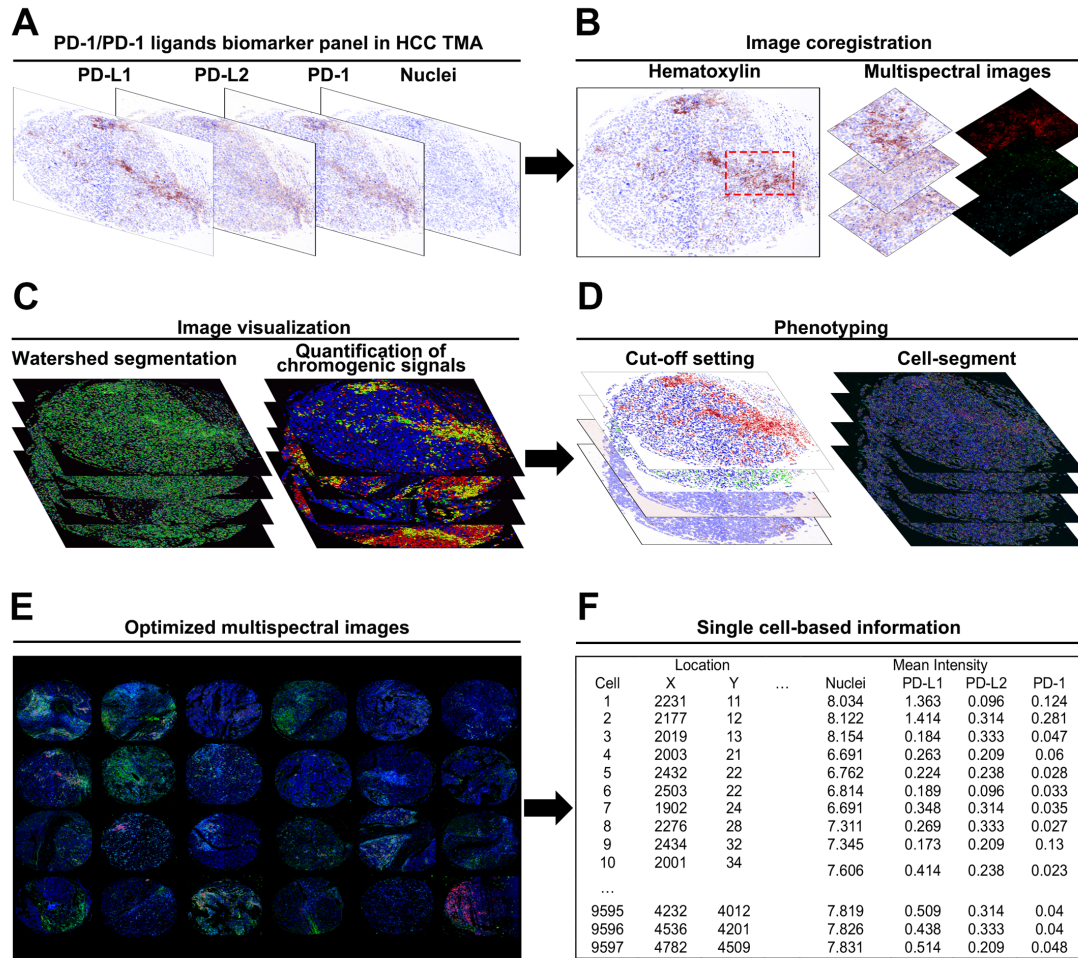

**Figure S2. Schematic overview of four-colors multispectral immunofluorescence workflow in HCC.**

(A) Representative images in bright field displayed the each of the three biomarker antibodies respectively and staining sequence in TMA. (B-D) Sequential steps of multiplexing work flow for analysis procedures. (B) Hematoxylin-stained images used for image coregistration, each individual marker in the composite image after spectral unmixing was highlighted in the enlarged subsection of the core as shown. (C) Image visualization, including watershed segmentation and quantification of chromogenic signals. (D) Image phenotyping, including setting up of optimized cut-off value and segment of individual cells. (E) The TMA core map consisted of representative composited images were shown in tumor and peritumor tissues respectively. (F) Acquisition of single cell information, pixel intensities of chromogenic signals were extracted and recorded by single-cell analysis, together with location in original images.

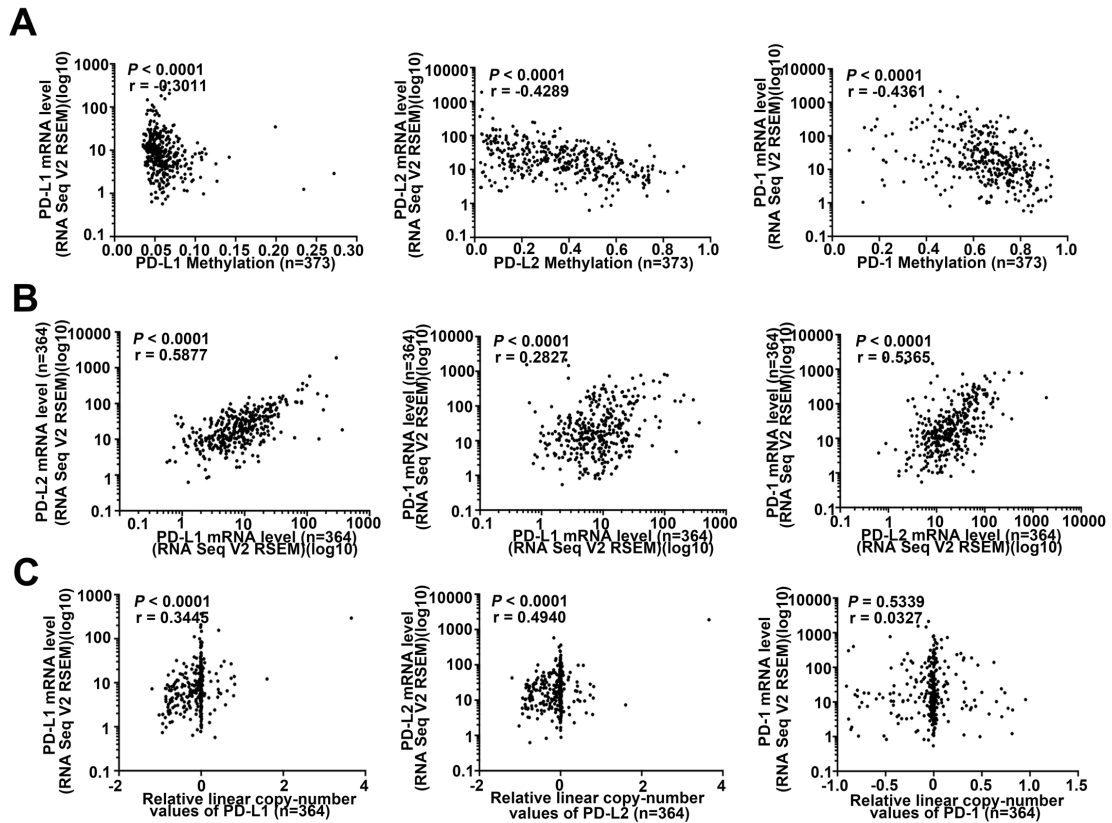

**Figure S3. Copy number values and transcriptional levels of PD-L1/PD-L2/PD-1 evaluated in HCC patients from TCGA database.**

(A) Significantly negative correlations were observed between PD-Ls/PD-1 DNA methylation and mRNA expression ( $n = 373$ ). (B) Markedly positive correlations were observed among the mRNA expression levels of PD-1 and PD-Ls. (C) Significantly positive correlations were found between copy number values and mRNA expression of PD-L1/PD-L2, but not in PD-1. Pearson correlation analysis.



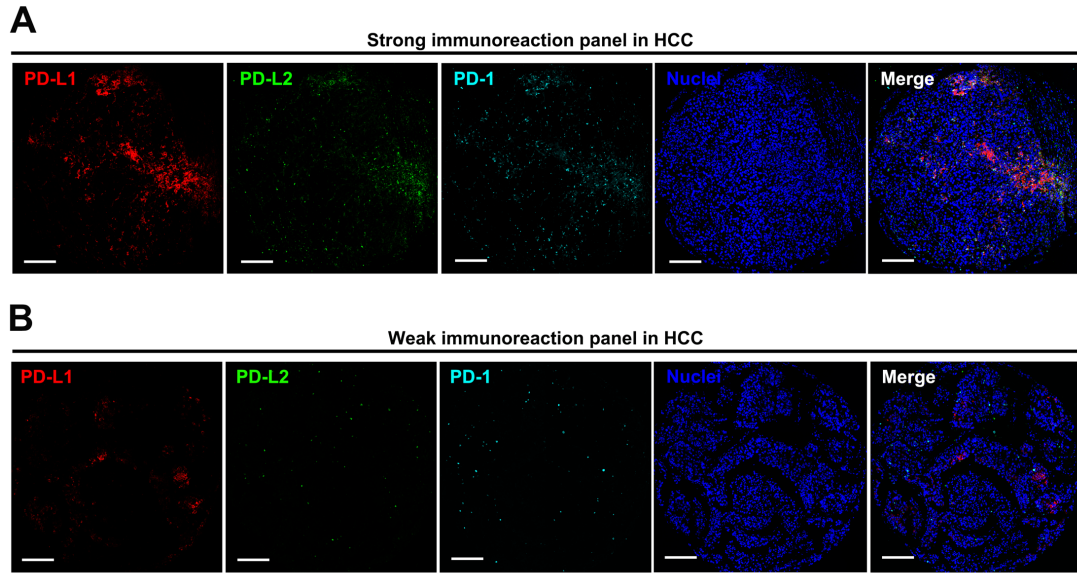

**Figure S4. Representative immunofluorescence images displayed two types of PD-Ls/PD-1 expression status in HCC.**

(A) Strong immunoreaction was observed with up-regulated PD-Ls expression and high-dense PD-1<sup>+</sup> immunocytes infiltration in HCC tumor tissues. (B) Weak immunoreaction was uncovered with limited PD-Ls expression and low-dense PD-1<sup>+</sup> immunocytes infiltration in HCC tumor tissues. Scale bar=50  $\mu$ m.

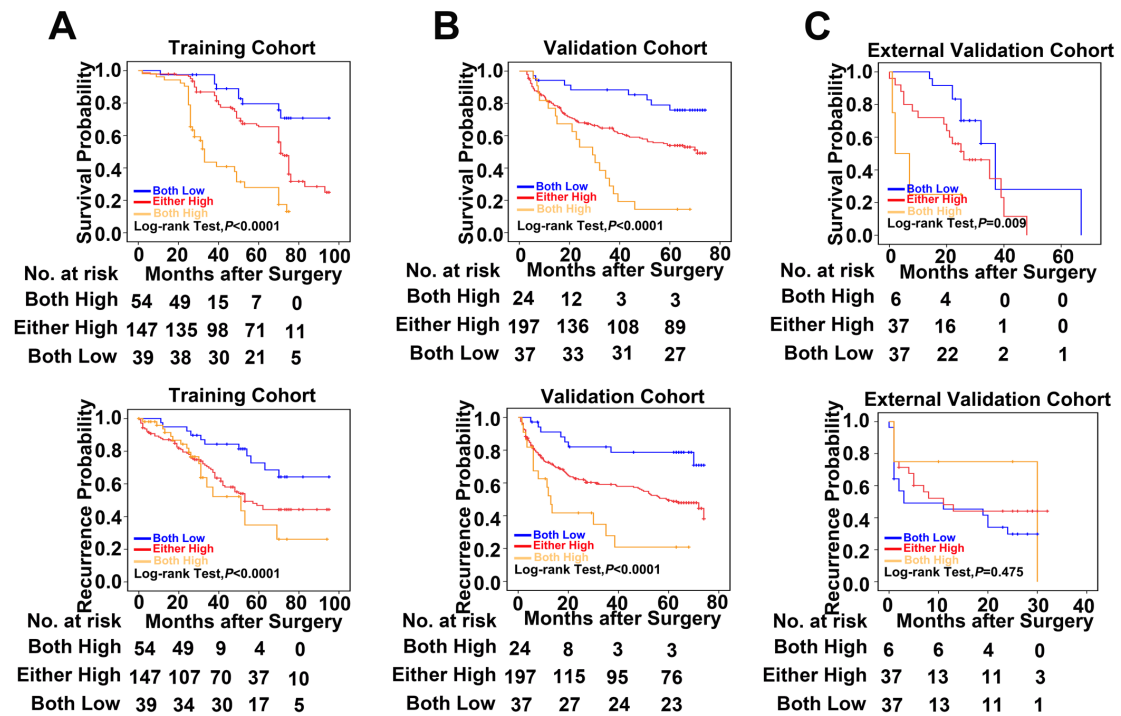

**Figure S5. Prognostic value of combination of PD-L1 expression and 9p24.1 alterations.**

(A) Kaplan-Meier curves showing that OS and TTR for the combination of PD-L1 expression

and 9p24.1 alteration were found to be statistically significant in training cohort (n = 240). **(B)** Significant differences in OS and TTR were validated in validation cohort based on combination of PD-L1 expression and 9p24.1 alteration (n = 258). **(C)** Significant difference in OS was validated in external validation cohort based on combination of PD-L1 expression and 9p24.1 alteration (n = 80). *P* values was determined by the log-rank test.

**Table S1. Patients clinical and pathologic characteristics.**

| Characteristics                                               | Training cohort<br>(n=240) | Validation cohort<br>(n=258) | External independent<br>cohort (n=80) | P*                 |
|---------------------------------------------------------------|----------------------------|------------------------------|---------------------------------------|--------------------|
| Age (years) (Median, Range)                                   | 56(18-83)                  | 49(10-79)                    | 44(29-75)                             | 0.051              |
| Gender (Male vs. Female)                                      | 192/48                     | 220/38                       | 51/29                                 | 0.635              |
| Virus infection (Yes vs. No)                                  | 222/18                     | 255/3                        | 77/3                                  | 0.786              |
| Preoperative $\alpha$ -Fetoprotein (ng/ml) (Median, Range)    | 85.3(0-60500.0)            | 6671.8(0-60500.0)            | 1137(0.9-60500.0)                     | 0.904              |
| Preoperative alanine aminotransferase (U/L) (Median, Range)   | 35(8-851)                  | 36(10-561)                   | NA                                    | 0.377 <sup>†</sup> |
| Preoperative g-glutamyl transferase (units/L) (Median, Range) | 57(10-632)                 | 63(13-648)                   | NA                                    | 0.013 <sup>†</sup> |
| Preoperative total bilirubin ( $\mu$ mol/L) (Median, Range)   | 11.4(2.2-240.3)            | 13.3(4.4-37.1)               | 15.2(6.3-76.7)                        | 0.323              |
| Liver cirrhosis (Yes vs. No)                                  | 202/38                     | 233/25                       | 62/18                                 | 0.702              |
| Maximum diameter (cm) ( $\leq 5$ vs. $>5$ )                   | 139/101                    | 137/121                      | 59/21                                 | 0.052              |
| Tumor encapsulation (Complete vs. None)                       | 146/94                     | 144/114                      | 65/15                                 | 0.118              |
| Tumor multiplicity (multiple vs. single)                      | 56/184                     | 45/213                       | 60/20                                 | 0.623              |
| Tumor differentiation (poor vs. well)                         | 80/160                     | 77/181                       | 31/49                                 | 0.329              |

|                                                  |         |         |       |                    |
|--------------------------------------------------|---------|---------|-------|--------------------|
| Vascular invasion (Yes vs. No)                   | 87/153  | 91/167  | 29/51 | 0.212              |
| Hepatic hilar lymph node metastasis (Yes vs. No) | 8/232   | 6/252   | NA    | 0.421 <sup>†</sup> |
| UICC TNM stage (I vs. II-III)                    | 161/79  | 146/112 | 28/52 | 0.169              |
| BCLC stage (0-A vs. B-C)                         | 103/137 | 102/156 | 18/62 | 0.116              |
| Alive with of recurrence (Yes vs. No)            | 75/165  | 121/137 | 36/44 | 0.168              |

---

**Abbreviation:** UICC, International Union Against Cancer; TNM, Topography Lymph Node Metastasis; BCLC: Barcelona Clinic Liver Cancer. \*The Chi square test was applied. <sup>†</sup>Unpaired t test was applied.

**Table S2. Univariate analysis of factors associated with recurrence and survival in three independent cohorts (n=578).**

| Variables                                | OS                    |                       |                       | TTR                   |                       |                       |
|------------------------------------------|-----------------------|-----------------------|-----------------------|-----------------------|-----------------------|-----------------------|
|                                          | Training cohort       | Validation cohort     | External cohort       | Training cohort       | Validation cohort     | External cohort       |
|                                          | Univariate <i>P</i> * |
| Age, years (>51 vs. ≤51)                 | 0.889                 | 0.957                 | 0.156                 | 0.852                 | 0.727                 | 0.340                 |
| Gender (male vs. female)                 | 0.973                 | 0.490                 | 0.258                 | 0.476                 | 0.843                 | 0.445                 |
| HBsAg (positive vs. negative)            | 0.155                 | 0.319                 | 0.167                 | 0.321                 | 0.410                 | 0.867                 |
| HBcAg (positive vs. negative)            | 0.743                 | 0.295                 | NA                    | 0.681                 | 0.211                 | NA                    |
| Serum AFP, ng/ml (>20 vs. ≤20)           | 0.247                 | <b>0.001</b>          | 0.241                 | 0.959                 | <b>0.012</b>          | 0.230                 |
| Serum ALT, U/L (>75 vs. ≤75)             | 0.843                 | 0.344                 | NA                    | 0.613                 | 0.279                 | NA                    |
| Serum γ-GT, U/L (>54 vs. ≤54)            | <b>&lt;0.0001</b>     | <b>0.015</b>          | NA                    | <b>0.040</b>          | 0.057                 | NA                    |
| Liver cirrhosis (yes vs. no)             | 0.728                 | 0.473                 | 0.887                 | 0.299                 | 0.859                 | 0.775                 |
| Tumor size (cm) (>5 vs. ≤5)              | <b>&lt;0.0001</b>     | <b>&lt;0.0001</b>     | 0.191                 | <b>0.004</b>          | <b>&lt;0.0001</b>     | 0.140                 |
| Tumor multiplicity (multiple vs. single) | <b>&lt;0.0001</b>     | 0.229                 | 0.297                 | 0.336                 | 0.072                 | 0.769                 |
| Tumor differentiation (poor vs. well)    | <b>&lt;0.0001</b>     | <b>&lt;0.0001</b>     | 0.725                 | <b>0.012</b>          | <b>0.012</b>          | 0.094                 |
| Tumor encapsulation (yes vs. no)         | <b>0.012</b>          | <b>0.045</b>          | 0.073                 | <b>0.002</b>          | <b>0.034</b>          | 0.476                 |
| Vascular invasion (yes vs. no)           | <b>&lt;0.0001</b>     | <b>&lt;0.0001</b>     | 0.318                 | 0.374                 | <b>&lt;0.0001</b>     | 0.673                 |

|                                      |                   |                   |              |              |                   |       |
|--------------------------------------|-------------------|-------------------|--------------|--------------|-------------------|-------|
| TNM stage (III-II vs. I)             | <b>0.006</b>      | <b>&lt;0.0001</b> | 0.191        | <b>0.030</b> | <b>&lt;0.0001</b> | 0.140 |
| BCLC stage (B-C vs. 0-A)             | <b>0.012</b>      | <b>&lt;0.0001</b> | 0.436        | <b>0.001</b> | <b>&lt;0.0001</b> | 0.089 |
| 9p24.1 alteration (with vs. without) | <b>&lt;0.0001</b> | <b>0.0009</b>     | <b>0.019</b> | 0.392        | <b>0.024</b>      | 0.843 |
| mRNA level of PD-L1 (High vs. Low)   | 0.598             | NA                | NA           | 0.556        | NA                | NA    |
| mRNA level of PD-L2 (High vs. Low)   | 0.437             | NA                | NA           | 0.913        | NA                | NA    |
| PD-L1 tumor (High vs. Low)           | <b>&lt;0.0001</b> | <b>0.003</b>      | <b>0.024</b> | <b>0.005</b> | <b>0.008</b>      | 0.548 |
| PD-L2 tumor (High vs. Low)           | <b>0.007</b>      | <b>0.002</b>      | <b>0.002</b> | 0.138        | <b>0.002</b>      | 0.893 |

**NOTE:** \*Kaplan–Meier method (log-rank test) in SPSS was performed to accomplish univariate analysis.

**Abbreviations:** TTR, time to recurrence; HBsAg, hepatitis B surface antigen; HBcAg, hepatitis B center antigen; AFP, alpha-fetoprotein; ALT, alanine transaminase;  $\gamma$ -GT,  $\gamma$ -glutamyltransferase; TNM, tumor-node-metastasis; BCLC, Barcelona Clinic Liver Cancer.



**Table S3. Multivariate analysis of factors associated with OS and TTR.**

| Variables                                | OS              |                  |                  |                   |                  |              | TTR             |                  |              |                   |                  |              |
|------------------------------------------|-----------------|------------------|------------------|-------------------|------------------|--------------|-----------------|------------------|--------------|-------------------|------------------|--------------|
|                                          | Training cohort |                  |                  | Validation cohort |                  |              | Training cohort |                  |              | Validation cohort |                  |              |
|                                          | HR              | 95%CI            | P*               | HR                | 95%CI            | P*           | HR              | 95%CI            | P*           | HR                | 95%CI            | P*           |
| Serum AFP, ng/ml (>20 vs. ≤20)           | NA              | NA               | NA               | 1.46              | 0.87-2.44        | 0.150        | NA              | NA               | NA           | <b>1.46</b>       | <b>0.97-2.20</b> | <b>0.068</b> |
| Serum γ-GT, U/L (>54 vs. ≤54)            | <b>1.64</b>     | <b>1.11-2.40</b> | <b>0.011</b>     | 1.00              | 0.49-2.04        | 0.994        | 1.20            | 0.78-1.86        | 0.404        | NA                | NA               | NA           |
| Tumor size (cm) (>5 vs. ≤5)              | <b>1.91</b>     | <b>1.29-2.82</b> | <b>0.001</b>     | 1.52              | 0.91-2.55        | 0.106        | <b>1.59</b>     | <b>1.01-2.48</b> | <b>0.044</b> | 1.53              | 0.93-2.53        | 0.098        |
| Tumor multiplicity (multiple vs. single) | 1.14            | 0.74-1.76        | 0.542            | NA                | NA               | NA           | NA              | NA               | NA           | NA                | NA               | NA           |
| Tumor differentiation (poor vs. well)    | <b>1.56</b>     | <b>1.05-2.32</b> | <b>0.026</b>     | <b>1.55</b>       | <b>1.05-2.29</b> | <b>0.027</b> | <b>0.01</b>     | <b>1.16-2.79</b> | <b>0.009</b> | <b>1.55</b>       | <b>1.05-2.28</b> | <b>0.026</b> |
| Tumor encapsulation (yes vs. no)         | 0.78            | 0.53-1.13        | 0.192            | 1.04              | 0.70-1.53        | 0.853        | <b>0.62</b>     | <b>0.41-0.95</b> | <b>0.027</b> | 1.04              | 0.70-1.53        | 0.853        |
| Vascular invasion (yes vs. no)           | <b>1.57</b>     | <b>1.05-2.36</b> | <b>0.028</b>     | 1.41              | 0.89-2.23        | 0.148        | NA              | NA               | NA           | 1.41              | 0.89-2.22        | 0.142        |
| TNM stage (III-II vs. I)                 | 1.56            | 0.98-2.49        | 0.058            | <b>1.65</b>       | <b>1.02-2.65</b> | <b>0.041</b> | 0.95            | 0.56-1.59        | 0.835        | 1.65              | 1.03-2.63        | 0.037        |
| BCLC stage (B-C vs. 0-A)                 | 0.95            | 0.59-1.53        | 0.857            | <b>3.09</b>       | <b>1.59-6.05</b> | <b>0.001</b> | <b>1.86</b>     | <b>1.06-3.26</b> | <b>0.030</b> | <b>3.10</b>       | <b>1.59-6.02</b> | <b>0.001</b> |
| PD-L1 tumor (High vs. Low)               | <b>2.11</b>     | <b>1.44-3.08</b> | <b>&lt;0.001</b> | <b>2.16</b>       | <b>1.38-3.38</b> | <b>0.001</b> | <b>1.78</b>     | <b>1.17-2.71</b> | <b>0.007</b> | <b>2.16</b>       | <b>1.38-3.38</b> | <b>0.001</b> |

**NOTE:** \* Cox proportional hazards models in SPSS was performed to accomplish multivariate analysis.

**Abbreviations:** OS, overall survival; TTR, time to recurrence; AFP, alpha-fetoprotein; γ-GT, γ-glutamyltransferase; TNM, tumor-node-metastasis; BCLC, Barcelona Clinic Liver Cancer; NA, not applicable.

**Table S4. Multivariate analysis of factors associated with OS and TTR.**

| Characteristics                          | OS              |                  |              |                   |                  |              | TTR             |                  |              |                   |                  |              |
|------------------------------------------|-----------------|------------------|--------------|-------------------|------------------|--------------|-----------------|------------------|--------------|-------------------|------------------|--------------|
|                                          | Training cohort |                  |              | Validation cohort |                  |              | Training cohort |                  |              | Validation cohort |                  |              |
|                                          | HR              | 95%CI            | <i>P</i> *   | HR                | 95%CI            | <i>P</i> *   | HR              | 95%CI            | <i>P</i> *   | HR                | 95%CI            | <i>P</i> *   |
| Serum AFP, ng/ml (>20 vs. ≤20)           | NA              | NA               | NA           | 1.58              | 0.95-2.65        | 0.080        | NA              | NA               | NA           | <b>1.55</b>       | <b>1.03-2.34</b> | <b>0.035</b> |
| Serum $\gamma$ -GT, U/L (>54 vs. ≤54)    | <b>1.66</b>     | <b>1.13-2.42</b> | <b>0.009</b> | 0.96              | 0.47-1.95        | 0.900        | 1.23            | 0.80-1.90        | 0.341        | NA                | NA               | NA           |
| Tumor size (cm) (>5 vs. ≤5)              | <b>1.91</b>     | <b>1.28-2.86</b> | <b>0.001</b> | 1.40              | 0.84-2.34        | 0.198        | 1.52            | 0.97-2.38        | 0.068        | 1.39              | 0.84-2.29        | 0.196        |
| Tumor multiplicity (multiple vs. single) | 1.12            | 0.73-1.73        | 0.611        | NA                | NA               | NA           | NA              | NA               | NA           | NA                | NA               | NA           |
| Tumor differentiation (poor vs. well)    | 1.38            | 0.93-2.05        | 0.113        | <b>1.63</b>       | <b>1.11-2.41</b> | <b>0.013</b> | <b>1.80</b>     | <b>1.16-2.80</b> | <b>0.009</b> | <b>1.63</b>       | <b>1.11-2.39</b> | <b>0.013</b> |
| Tumor encapsulation (yes vs. no)         | 0.71            | 0.49-1.03        | 0.067        | 1.14              | 0.77-1.68        | 0.527        | <b>0.57</b>     | <b>0.38-0.87</b> | <b>0.008</b> | 1.13              | 0.77-1.68        | 0.528        |
| Vascular invasion (yes vs. no)           | <b>1.53</b>     | <b>1.03-2.28</b> | <b>0.036</b> | 1.45              | 0.93-2.27        | 0.106        | NA              | NA               | NA           | 1.44              | 0.93-2.26        | 0.106        |
| TNM stage (III-II vs. I)                 | <b>1.70</b>     | <b>1.06-2.74</b> | <b>0.029</b> | 1.36              | 0.86-2.17        | 0.191        | 0.94            | 0.56-1.59        | 0.821        | 1.37              | 0.87-2.16        | 0.178        |
| BCLC stage (B-C vs. 0-A)                 | 0.85            | 0.52-1.38        | 0.505        | <b>3.09</b>       | <b>1.59-6.00</b> | <b>0.001</b> | <b>1.76</b>     | <b>1.00-3.10</b> | <b>0.050</b> | <b>3.10</b>       | <b>1.59-6.01</b> | <b>0.001</b> |
| PD-L2 tumor (High vs. Low)               | 1.50            | 0.96-2.35        | 0.079        | 1.44              | 0.98-2.11        | 0.065        | NA              | NA               | NA           | 1.44              | 0.98-2.11        | 0.065        |

**NOTE:** \*Cox proportional hazards models in SPSS was performed to accomplish multivariate analysis.

**Abbreviations:** OS, overall survival; TTR, time to recurrence; AFP, alpha-fetoprotein;  $\gamma$ -GT,  $\gamma$ -glutamyltransferase; TNM, tumor-node-metastasis; BCLC, Barcelona Clinic Liver Cancer; NA, not applicable.

**Table S5. Multivariate analysis of factors associated with survival and recurrence.**

| Variables                              | Training cohort |                  |                  |             |                  |              | Validation cohort |                  |              |             |                  |              |
|----------------------------------------|-----------------|------------------|------------------|-------------|------------------|--------------|-------------------|------------------|--------------|-------------|------------------|--------------|
|                                        | Multivariate    |                  |                  |             |                  |              | Multivariate      |                  |              |             |                  |              |
|                                        | OS              |                  |                  | TTR         |                  |              | OS                |                  |              | TTR         |                  |              |
|                                        | HR              | 95%CI            | P*               | HR          | 95%CI            | P*           | HR                | 95%CI            | P*           | HR          | 95%CI            | P*           |
| Serum AFP, ng/ml (>20 vs. ≤20)         |                 | NA               |                  |             | NA               |              | <b>1.70</b>       | <b>1.03-2.28</b> | <b>.038</b>  | 1.36        | 0.92-2.01        | 0.118        |
| Serum γ-GT, U/L (>54 vs. ≤54)          | <b>1.55</b>     | <b>1.05-2.28</b> | <b>0.027</b>     | 1.27        | 0.82-1.97        | 0.291        | 0.85              | 0.42-1.73        | 0.653        |             | NA               |              |
| Tumor size (cm) (>5 vs. ≤5)            | <b>1.86</b>     | <b>1.25-2.77</b> | <b>0.002</b>     | 1.52        | 0.97-2.37        | 0.068        | <b>1.68</b>       | <b>1.03-2.72</b> | <b>0.037</b> | 1.16        | 0.74-1.83        | 0.525        |
| Tumor differentiation (poor vs. well)  | 1.33            | 0.89-1.98        | 0.163            | <b>1.79</b> | <b>1.15-2.80</b> | <b>0.010</b> | <b>1.64</b>       | <b>1.11-2.43</b> | <b>0.013</b> | 1.17        | 0.78-1.75        | 0.450        |
| Tumor encapsulation (yes vs. no)       | 0.79            | 0.54-1.15        | 0.214            | <b>0.63</b> | <b>0.42-0.96</b> | <b>0.032</b> | 1.16              | 0.79-1.70        | 0.457        | 1.21        | 0.83-1.76        | 0.330        |
| Vascular invasion (yes vs. no)         | <b>1.59</b>     | <b>1.06-2.38</b> | <b>0.026</b>     |             | NA               |              | <b>1.70</b>       | <b>1.10-2.63</b> | <b>0.017</b> | <b>1.75</b> | <b>1.11-2.76</b> | <b>0.016</b> |
| TNM stage (III-II vs. I)               | 1.55            | 0.98-2.43        | 0.061            | 0.93        | 0.55-1.55        | 0.768        |                   | NA               |              |             | NA               |              |
| BCLC stage (B-C vs. 0-A)               | 0.89            | 0.55-1.44        | 0.626            | 1.71        | 0.97-2.99        | 0.062        | <b>2.69</b>       | <b>1.36-5.34</b> | <b>0.004</b> | <b>2.09</b> | <b>1.13-3.87</b> | <b>0.019</b> |
| Combined PD-L1 and 9p24.1 alterations# |                 | NA               | <b>&lt;0.001</b> |             | NA               | 0.123        |                   | NA               | <b>0.004</b> |             | NA               | <b>0.003</b> |
| I vs. II                               | <b>0.38</b>     | <b>0.25-0.58</b> | <b>&lt;0.001</b> | 0.49        | 0.23-1.06        | 0.069        | 0.59              | 0.35-1.00        | 0.052        | 0.66        | 0.37-1.16        | 0.148        |
| I vs. III                              | <b>0.18</b>     | <b>0.08-0.38</b> | <b>&lt;0.001</b> | 0.94        | 0.54-1.64        | 0.827        | <b>0.23</b>       | <b>0.10-0.55</b> | <b>0.001</b> | <b>0.22</b> | <b>0.09-0.54</b> | <b>0.001</b> |

NOTE: \*Cox proportional hazards regression model, including all the clinic-pathologic features as covariates.

#Patients were divided into three groups: (I) both high expression of PD-L1 and 9p24.1 amplification/polysomy, (II) either high expression of PD-L1 or 9p24.1 amplification/polysomy, and (III) both low expression of PD-L1 and 9p24.1 disomy.

**Abbreviations:** OS, overall survival; TTR, time to recurrence; AFP, alpha-fetoprotein;  $\gamma$ -GT,  $\gamma$ -glutamyltransferase; TNM, tumor-node-metastasis; BCLC, Barcelona Clinic Liver Cancer; NA, not applicable.

**Table S6. Correlations of clinicopathologic characteristics with PD1/PD-Ls and PD-1 in HCC patients from training cohort (n=240) and validation cohort (n=258).**

| Characteristics | Training cohort (n=240) |     |                    |       |     |            |      |     |            | Validation cohort (n=258) |     |                    |       |     |                    |      |     |                    |  |
|-----------------|-------------------------|-----|--------------------|-------|-----|------------|------|-----|------------|---------------------------|-----|--------------------|-------|-----|--------------------|------|-----|--------------------|--|
|                 | PD-L1                   |     |                    | PD-L2 |     |            | PD-1 |     |            | PD-L1                     |     |                    | PD-L2 |     |                    | PD-1 |     |                    |  |
|                 | High                    | Low | <i>P</i> *         | High  | Low | <i>P</i> * | High | Low | <i>P</i> * | High                      | Low | <i>P</i> *         | High  | Low | <i>P</i> *         | High | Low | <i>P</i> *         |  |
| Age, years      |                         |     |                    |       |     |            |      |     |            |                           |     |                    |       |     |                    |      |     |                    |  |
| ≤51             | 42                      | 51  | 0.382              | 64    | 29  | 0.750      | 78   | 69  | 0.586      | 87                        | 44  | 0.527              | 61    | 70  | 0.262              | 81   | 50  | 0.261              |  |
| > 51            | 58                      | 89  |                    | 104   | 43  |            | 46   | 47  |            | 89                        | 38  |                    | 68    | 59  |                    | 87   | 40  |                    |  |
| Gender          |                         |     |                    |       |     |            |      |     |            |                           |     |                    |       |     |                    |      |     |                    |  |
| Female          | 22                      | 26  | 0.513              | 31    | 17  | 0.359      | 25   | 23  | 0.948      | 24                        | 14  | 0.468              | 15    | 23  | 0.159              | 22   | 16  | 0.318              |  |
| Male            | 78                      | 114 |                    | 137   | 55  |            | 99   | 93  |            | 152                       | 68  |                    | 114   | 106 |                    | 146  | 74  |                    |  |
| HBsAg           |                         |     |                    |       |     |            |      |     |            |                           |     |                    |       |     |                    |      |     |                    |  |
| Negative        | 4                       | 14  | 0.082 <sup>†</sup> | 13    | 5   | 0.831      | 7    | 11  | 0.259      | 5                         | 4   | 0.406 <sup>†</sup> | 4     | 5   | 0.734 <sup>†</sup> | 7    | 2   | 0.417 <sup>†</sup> |  |

|             |    |     |              |     |    |       |     |     |       |     |    |                    |     |     |                    |     |    |                    |
|-------------|----|-----|--------------|-----|----|-------|-----|-----|-------|-----|----|--------------------|-----|-----|--------------------|-----|----|--------------------|
| Positive    | 96 | 126 |              | 155 | 67 |       | 117 | 105 |       | 171 | 78 |                    | 125 | 124 |                    | 161 | 88 |                    |
| HBcAb       |    |     |              |     |    |       |     |     |       |     |    |                    |     |     |                    |     |    |                    |
| Negative    | 10 | 24  | 0.118        | 23  | 11 | 0.747 | 14  | 20  | 0.186 | 5   | 4  | 0.406 <sup>†</sup> | 5   | 4   | 0.734 <sup>†</sup> | 8   | 1  | 0.127 <sup>†</sup> |
| Positive    | 90 | 116 |              | 145 | 61 |       | 110 | 96  |       | 171 | 78 |                    | 124 | 125 |                    | 160 | 89 |                    |
| AFP (ng/ml) |    |     |              |     |    |       |     |     |       |     |    |                    |     |     |                    |     |    |                    |
| ≤20         | 38 | 53  | <b>0.022</b> | 59  | 32 | 0.172 | 44  | 47  | 0.422 | 60  | 39 | <b>0.038</b>       | 47  | 52  | 0.522              | 61  | 38 | 0.352              |
| >20         | 62 | 87  |              | 109 | 40 |       | 80  | 69  |       | 116 | 43 |                    | 82  | 77  |                    | 107 | 52 |                    |
| ALT (U/L)   |    |     |              |     |    |       |     |     |       |     |    |                    |     |     |                    |     |    |                    |
| ≤75         | 82 | 120 | 0.437        | 141 | 61 | 0.877 | 105 | 97  | 0.823 | 152 | 74 | 0.379              | 117 | 109 | 0.131              | 145 | 81 | 0.391              |
| >75         | 18 | 20  |              | 27  | 11 |       | 19  | 19  |       | 24  | 8  |                    | 12  | 20  |                    | 23  | 9  |                    |
| γ-GT (U/L)  |    |     |              |     |    |       |     |     |       |     |    |                    |     |     |                    |     |    |                    |
| ≤54         | 50 | 74  | 0.662        | 82  | 42 | 0.176 | 61  | 63  | 0.428 | 34  | 17 | 0.791              | 28  | 23  | 0.434              | 30  | 21 | 0.293              |
| >54         | 50 | 66  |              | 86  | 30 |       | 63  | 53  |       | 142 | 65 |                    | 101 | 106 |                    | 138 | 69 |                    |



|                   |    |     |              |     |    |              |     |    |              |     |    |       |     |     |              |     |    |              |
|-------------------|----|-----|--------------|-----|----|--------------|-----|----|--------------|-----|----|-------|-----|-----|--------------|-----|----|--------------|
| Liver cirrhosis   |    |     |              |     |    |              |     |    |              |     |    |       |     |     |              |     |    |              |
| No                | 18 | 20  | 0.437        | 22  | 16 | 0.076        | 21  | 17 | 0.628        | 20  | 11 | 0.637 | 13  | 18  | 0.338        | 15  | 16 | <b>0.037</b> |
| Yes               | 82 | 120 |              | 146 | 56 |              | 103 | 99 |              | 156 | 71 |       | 116 | 111 |              | 153 | 74 |              |
| Tumor size (cm)   |    |     |              |     |    |              |     |    |              |     |    |       |     |     |              |     |    |              |
| ≤5                | 50 | 89  | <b>0.036</b> | 88  | 51 | <b>0.008</b> | 60  | 79 | <b>0.002</b> | 77  | 42 | 0.262 | 48  | 71  | <b>0.004</b> | 75  | 44 | 0.514        |
| >5                | 50 | 51  |              | 80  | 21 |              | 64  | 37 |              | 99  | 40 |       | 81  | 58  |              | 93  | 46 |              |
| Tumor number      |    |     |              |     |    |              |     |    |              |     |    |       |     |     |              |     |    |              |
| Single            | 78 | 106 | 0.680        | 131 | 53 | 0.464        | 96  | 88 | 0.776        | 147 | 61 | 0.084 | 103 | 105 | 0.753        | 132 | 76 | 0.255        |
| Multiple          | 22 | 34  |              | 37  | 19 |              | 28  | 28 |              | 29  | 21 |       | 26  | 24  |              | 36  | 14 |              |
| Vascular invasion |    |     |              |     |    |              |     |    |              |     |    |       |     |     |              |     |    |              |
| No                | 66 | 87  | 0.540        | 103 | 50 | 0.229        | 77  | 76 | 0.582        | 108 | 55 | 0.376 | 73  | 90  | <b>0.028</b> | 98  | 65 | <b>0.028</b> |
| Yes               | 34 | 53  |              | 65  | 22 |              | 47  | 40 |              | 68  | 27 |       | 56  | 39  |              | 70  | 25 |              |
| Tumor             |    |     |              |     |    |              |     |    |              |     |    |       |     |     |              |     |    |              |

|            |    |     |              |     |    |                  |    |    |                  |     |    |              |    |     |              |     |    |                  |  |
|------------|----|-----|--------------|-----|----|------------------|----|----|------------------|-----|----|--------------|----|-----|--------------|-----|----|------------------|--|
| None       | 46 | 48  | 0.067        | 69  | 25 | 0.356            | 53 | 41 | 0.241            | 74  | 36 | 0.779        | 58 | 52  | 0.450        | 66  | 44 | 0.137            |  |
| Complete   | 54 | 92  |              | 99  | 47 |                  | 71 | 75 |                  | 102 | 46 |              | 71 | 77  |              | 102 | 46 |                  |  |
| Tumor      |    |     |              |     |    |                  |    |    |                  |     |    |              |    |     |              |     |    |                  |  |
| I+II       | 63 | 97  | 0.309        | 101 | 59 | <b>0.001</b>     | 86 | 74 | 0.361            | 116 | 60 | 0.244        | 90 | 86  | 0.593        | 112 | 64 | 0.357            |  |
| III+IV     | 37 | 43  |              | 67  | 13 |                  | 38 | 42 |                  | 60  | 22 |              | 39 | 43  |              | 56  | 26 |                  |  |
| TNM stage  |    |     |              |     |    |                  |    |    |                  |     |    |              |    |     |              |     |    |                  |  |
| I          | 59 | 102 | <b>0.024</b> | 99  | 62 | <b>&lt;0.001</b> | 71 | 90 | <b>&lt;0.001</b> | 142 | 57 | <b>0.047</b> | 93 | 106 | 0.054        | 123 | 76 | <b>0.041</b>     |  |
| II+III     | 41 | 38  |              | 69  | 10 |                  | 53 | 26 |                  | 34  | 25 |              | 36 | 23  |              | 45  | 14 |                  |  |
| BCLC stage |    |     |              |     |    |                  |    |    |                  |     |    |              |    |     |              |     |    |                  |  |
| 0-A        | 35 | 68  | <b>0.036</b> | 78  | 25 | 0.093            | 47 | 56 | 0.105            | 62  | 39 | <b>0.043</b> | 37 | 60  | <b>0.003</b> | 60  | 53 | <b>&lt;0.001</b> |  |
| B-C        | 65 | 72  |              | 90  | 47 |                  | 77 | 60 |                  | 118 | 43 |              | 92 | 69  |              | 108 | 37 |                  |  |

NOTE: \*The Pearson Chi square test was applied. † Chi-square with Yates' correction was applied.

**Abbreviations:** HCC, hepatocellular carcinoma; HBsAg, hepatitis B surface antigen; HBcAb, hepatitis B center antibody; AFP, alpha-fetoprotein; ALT, alanine transaminase;  $\gamma$ -GT,  $\gamma$ -glutamyltransferase; TNM, tumor-node-metastasis; BCLC, Barcelona Clinic Liver Cancer.
